# Supplementary material for: Temperature acclimation in hot-spring snakes and the convergence of cold response
Source: PubMed Central journal article supplement — Innovation (Camb). 2022 Aug 1;3(5):100295. doi: 10.1016/j.xinn.2022.100295 (PMC9405097; doi:10.1016/j.xinn.2022.100295), 2022-08-01
Supplement: mmc1.pdf [file mmc1.pdf]

**The Innovation, Volume 3**

**Supplemental Information**

**Temperature acclimation in hot-spring snakes  
and the convergence of cold response**

**Chaochao Yan, Wei Wu, Wenqi Dong, Bicheng Zhu, Jiang Chang, Yunyun Lv, Shilong Yang, and Jia-Tang Li**

## **Supplementary Information:**

### **The supplemental file includes:**

Materials and Methods

Figures S1–S8

Tables S1–S6, S11, S12, S14, S15

Captions for Tables S7–S10, S13 (.xlsx)

Supplementary Videos S1-S3

## **Materials and Methods**

### **Behavioral experiments and distribution information collection**

The three snakes used in the experiment are of similar body length (*Thermophis baileyi*,  $48.56 \pm 14.71$  cm; *Pantherophis guttatus*,  $52.3 \pm 12.3$  cm; *Pareas menglaensis*,  $45.3 \pm 5.27$  cm). To prevent interference from the surrounding heat, we wrapped the plastic experiment box in tin foil. Pure water at a low temperature ( $16.34 \pm 2.22$  °C) was placed inside the box. After placing the snake into the adaptation zone, we removed the dummy plate, and recorded snake choices (preference) and latency (time to snakes arriving at resting stone). We considered the subjects to have made a choice only if they remained on the selected stone for more than 30 s. The entire process was video-recorded using a mobile phone. Each snake was tested three times and the heating pad was randomized in each test. The central temperature of the heating pad was  $36.13 \pm 1.84$  °C. After each test, the chamber was cleaned with 75% alcohol to eliminate residual odors. A total of 12 *T. baileyi*, five *P. guttatus*, and 10 *P. menglaensis* were used for behavioral experiments. Information on the distribution of snakes was collected from voucher specimens deposited at the Herpetological Museum, Chengdu Institute of Biology,

Chinese Academy of Sciences (Chengdu, China) and from published data (Table S1, S2).<sup>1-5</sup>

### **Genome sequencing and assembly**

Blood tissue from the *T. baileyi* female that used to generate our previous draft genome<sup>6</sup> was used here to produce long reads. Whole genomic DNA was isolated and used to construct continuous long reads (CLR) DNA libraries with insert-size lengths of ~30 kb. The libraries were sequenced on a PacBio Sequel II sequencer. For *de novo* assembly of the *T. baileyi* genome, we first assembled initial contigs using short-read sequencing data, resulting in library insert sizes of 280 bp and 500 bp Illumina (~120 ×) by Platanus v1.2.4<sup>7</sup> with optimized parameters (-k 31 -t 8 -d 0.3 -m 200). Subsequently, the initial contigs were aligned to PacBio long reads (~180 ×) to construct contigs using DBG2OLC.<sup>8</sup> Base errors in the contigs were then polished based on PacBio long reads and Illumina short-reads using NextPolish v1.0.4.<sup>9</sup> BUSCO v5.1.3<sup>10</sup> was used to estimate the completion of the assembled genome.

### **Chromosome construction with Hi-C data**

Liver tissue from a female hot-spring snake was sent to Anoroad Genome (Yiwu, China), where DNA was extracted and replicate Hi-C sequencing libraries were prepared. A total of 200 Gb of Hi-C data were produced at the Novogene Company (Tianjing, China) on two separate lanes of the Illumina HiSeq 4000 platform using 150-bp paired-end reads. Clean Illumina paired-end reads were mapped to the assembled

genome to construct a Hi-C map using the Juicer pipeline,<sup>11</sup> with binning at multiple resolutions (150, 500, and 1 000 kb).<sup>12</sup> Genome assembly quality was evaluated using BUSCO v5.1.3 with parameters -l vertebrata\_odb10 -m genome -c 20 --limit 10.

### **Gene structural and functional annotations**

Transcriptome data from a previous study were used for protein-coding gene (PCG) annotation.<sup>6</sup> Repeat elements were annotated and masked in the updated reference genome before gene model annotation. We applied Tandem Repeats Finder and RepeatMasker v4.1.0 for *ab initio* prediction of repeat elements in the genome.<sup>13</sup> Gene annotation was performed on the repetitive element-masked genome. Homology-, *ab initio*-, and transcriptome-based gene prediction methods were then used. The protein sequences of relative snake genomes were downloaded from Ensembl. Proteins from closely related snake species (*Naja naja*, *Ophiophagus hannah*, *Thamnophis elegans*, and *Pantherophis guttatus*) were mapped to the updated genome for homology prediction. Functional annotations of the PCGs were applied using BlastP-annotated proteins against the NR (non-redundant protein sequences in NCBI), SwissProt, and RefSeq databases (evalue < 1e-5). The NR BlastP results were processed using Blast2GO v5.2.5<sup>14</sup> to retrieve associated Gene Ontology (GO) terms describing biological processes, molecular functions, and cellular components (evalue < 1e-5). Kyoto Encyclopedia of Genes and Genomes (KEGG) KO and mapping information of each gene was obtained using the KOBAS v3.0.3 database.<sup>15</sup> The motifs and domains of each gene model were predicted by InterProScan against ProDom, PRINTS, Pfam,

Gene3D, CCD, SMART, PANTHER, PROSITE, and SUPERFAMILY.

### **Genome-wide convergent analysis**

Orthofinder v2.2.7 was used to identify single-copy gene families in *T. baileyi* and 31 other species with Markov clustering (MCL) inflation parameter set as 3 (Table S15).<sup>16</sup> Single gene clusters were then extracted and translated using self-made python scripts and the protein sequences from each family were aligned using prank v.150803 (<http://wasabiapp.org/software/prank>) with default parameters.<sup>17</sup> The alignments were trimmed with trimAl v1.4 in automated1 mode, and columns with gaps more than 0.5 and samples with more than 50% unusable sites were filtered.<sup>18</sup> DNA alignments were back translated according to the corresponding trimmed protein alignments using self-made scripts. The branch model of CODEML in PAML4.9<sup>19</sup> was used to test for potentially common rapidly evolving genes among high-altitude species. High-altitude species living in the QTP, i.e., *T. baileyi*, *N. parkeri*, *B. grunniens*, *O. curzoniae* and *P. humilis*, were set as the foreground branches and others as background branches. The null hypothesis was that the  $\omega$  of each branch was equal (model = 0), while the alternative hypothesis allowed more than one  $\omega$  (model = 2) across branches. The *P*-values were calculated based on the likelihood ratio test (LRT) for each model with chi-square test, with *P*-value < 0.01 representing significant common rapidly evolving genes

### **Gene family analysis**

Orthologous groups of 33 species (Table S15) were constructed using OrthoFinder

v2.2.7.<sup>16</sup> Four-fold degenerate sites in the coding sequences (CDS) alignments were extracted with self-made scripts. All four-fold degenerate sites were then concatenated by species and used for phylogenomic analysis. A maximum-likelihood tree was constructed using IQ-TREE v 1.6.5<sup>20</sup> with parameters: -nt 10 -st DNA -bb 1000 -alrt 1000. Divergence time of species in the tree were calculated with MCMCTREE in PAML4.9<sup>19</sup>. Three divergence times, including that between ancestors of *Xenopus tropicalis* and *Homo sapiens*, between ancestors of *Homo sapiens* and *Mus musculus* and between ancestors of *Homo sapiens* and *Gallus gallus* were set according to the TimeTree website resource (<http://www.timetree.org>). Gene family expansion and contraction analyses were performed using CAFE v4.2.1.<sup>21</sup> Expanded and contracted gene families on each branch of the tree were detected by comparing the cluster size of each branch with the maximum-likelihood cluster size of the ancestral node leading to that branch; a small ancestral node indicated gene family expansion, whereas a large ancestral node indicated gene family contraction. The overall *P*-value (family-wide *P*-value in CAFE v4.2.1 based on 10,000 Monte Carlo resampling) was used to estimate the significant size variation for each gene family. For each branch or node, the exact *P*-value was calculated with Viterbi method to identify lineage-specific significantly varied gene families (overall *P*-value < 0.01).

### **Positively selected genes (PSGs) and rapidly evolving genes (REGs)**

To identify potential PSGs and REGs in the *T. baileyi* genome, we used single-copy genes belonging to *T. baileyi* and 15 other species (i.e., *Pseudonaja textilis*,

*Pantherophis guttatus*, *Ophiophagus hannah*, *Python bivittatus*, *Crotalus viridis viridis*, *Notechis scutatus*, *Deinagkistrodon acutus*, *Naja naja*, *Boa constrictor*, *Hydrophis curtus*, *Podarcis muralis*, *Zootoca vivipara*, *Chelonia mydas*, *Crocodylus porosus*, and *Gallus gallus*) (Table S15). The branch-site model of CODEML in PAML v4.9<sup>19</sup> was used to test for potential PSGs, with *T. baileyi* set as the foreground branch and others set as background branches. The branch and site models were set to 2. In the null hypothesis, the  $\omega$  value of each site on each branch was fixed to 1, whereas the alternative hypothesis was that the  $\omega$  values of particular sites on the foreground branch were not fixed. The REGs are genes responsible for rapid divergence among taxa.<sup>22</sup> To identify REGs, we used the branch model, in which the alternative model allows different rates for different branches. The null hypothesis was that the  $\omega$  of each branch was equal (model = 0), while the alternative hypothesis allowed more than one  $\omega$  (model = 2) across branches. Chi-Square  $\chi^2$  and *P*-value for the likelihood ratio test were then determined following the CODEML processes. According to Bayes Empirical Bayes analysis, PSGs were defined based on a corrected *P*-value < 0.05 and at least one positively selected site with a posterior probability > 0.95.

## **Lineage-species mutations and unique genomic regions**

Lineage-species mutation was considered associated with lineage-specific adaptive characteristics.<sup>23</sup> To identify genes with species-specific mutations or unique regions in *T. baileyi*, we extracted sequences from 11-row alignments produced by multiz (v 11.2), with *T. baileyi* as the reference (Table S15). A self-made python script was then prepared to identify species-specific mutations and unique regions, referring to a previous study.<sup>24</sup> We defined *T. baileyi*-specific sequences as unique regions if they satisfied the following three criteria: 1) were only found in *T. baileyi*; 2) did not align with other lineages; 3) were located in the reconstructed genome of the most recent common ancestor (MRCA) of *T. baileyi*. The *T. baileyi*-specific mutations were screened from the alignment. To detect unique genes that evolved in *T. baileyi*, we first selected genes that overlapped with the *T. baileyi* lineage-specific sequence by more than 8 bp, which is longer than 99% of all unique regions, and the unique region are overlapped within exons or adjacent region (+2 bp or -2 bp) between exons and introns. We further evaluated the significance of unique regions enriched in the corresponding genes with a permutation test implemented in R package regioneR v1.18.1.<sup>25</sup> For each unique gene, 100 permutations were performed to get the unique genes with  $P$ -value < 0.01.

## **Chromosome synteny and evolutionary breakpoint regions (EBRs)**

The PCGs were first used to construct a chromosome evolutionary landscape with the JCVI v1.1.11 utility libraries for python (<https://github.com/tanghaibao/jcvi>). Firstly,



orthologous proteins between two species were confirmed with the `jcvi.compara.catalog` module and block subsets were built based on the anchor file, which contained the genomic coordinates of each gene. The relationships of each block were visualized with the `jcvi.graphics.karyotype` module. Whole-genome synteny blocks were also identified with pipelines implemented in the `mySyntenyPortal`.<sup>26</sup> Whole-genome alignment of *T. baileyi* and other species was built with `Lastz_D v1.03` (<https://github.com/lastz/lastz>). Homology synteny blocks (HSBs) were estimated with `makeBlocks` implemented in `DESCHRAMBLER` with resolution set as 100 kb.<sup>27</sup> We used a self-made script to identify EBRs between two adjacent HSBs based on the following criteria: 1) corresponding adjacent HSBs were in different target chromosomes; 2) adjacent HSBs in target chromosomes were broken by DNA fragments longer than 100 kb; 3) one adjacent HSBs was reversed in the target chromosomes. The EBR genes were defined as genes within 20-kb regions of the EBR flanks. The EBRs were visualized in chromosomes with the R package `RIdeogram`.

### **Rapidly evolving conserved non-coding elements (CNEs)**

The genomes of 12 species (Table S15) were used to identify CNEs. The genome of *T. baileyi* was set as the reference. The other genomes were aligned to the reference using `lastz_D`. The MAF format files were further built into colinear alignment chains using `axtChain` (<https://github.com/ucscGenomeBrowser/kent>), followed by the `net` process using `chainNet` implemented in `multiz`. We removed low-scoring alignment nets with false homologies based on nets < 4 kb and scores < 20,000 with a span in both the

reference and query genomes. Multiz<sup>28</sup> was used to build multiple alignments, taking the filtered pairwise alignment nets as input. The phylogenetic position of the species selected was taken from our phylogenomic tree.

To compute local and global identity percentages between the CNE sequences of species and reconstructed ancestors as well as species and all common ancestors,<sup>29</sup> we used phylogeny aware PRANK v.150803 aligner with parameters “-keep -showtree -showanc -prunetree -seed 10”, with the species tree assigned with the -t parameter. We determined the sequence identity percentage between the aligned ancestral sequence and CNE sequence of each species using the python module ete3<sup>29</sup>. The “Forward Genomics” generalized least square (GLS) approach<sup>30</sup> was used to identify significantly more-diverged CNEs in the *T. baileyi* genome (parameters: -thresholdConserved=0) and to compute the significance of associations between sequence-divergence and phenotypes. We set *T.baileyi* as the ingroup with ‘pheno’ set to 0, while the other species set as the outgroup. CNEs for which sequence identity values could not be calculated for *T. baileyi* were filtered. CNEs with GLS *P*-values < 0.05 were retained.

### **GO and KEGG enrichment analysis and structural prediction**

GO enrichment analysis was performed using the R package clusterProfiler v4.0.1<sup>31</sup>. All annotated genes were set as background, while GO terms were obtained through annotation pipelines (see above). A hypergeometric test was performed to obtain the *P*-value for each GO term, and the Benjamini-Hochberg false discovery rate (FDR) multiple-test was then calculated. GO terms with a corrected *P*-value < 0.05 were

considered significantly enriched. Functional prediction was performed using PROVEAN v1.1.5 (Protein Variation Effect Analyzer), mutation was classified as deleterious if PROVEAN score less than -2.5.<sup>33</sup> Domain architectures of TRPA1 and TRPV4 were explored with SMART (<https://smart.embl-heidelberg.de/>). 3D protein structure was calculated with alphafold v2.0.0 in casp14 model with max\_template\_date set to 2000-05-14.<sup>32</sup> The topological similarity of protein structures were assessed with template modeling score (TM-Score).<sup>34</sup>

### **Laser irradiation experiments**

We followed the laser irradiation protocols of Liu et al. (2011). Firstly, HEK293T cells were cultured in Dulbecco's modified Eagle medium with 10% fetal bovine serum and 1% penicillin/streptomycin, then incubated at 37 °C for 12–24 h with 5% CO<sub>2</sub>. Transfection was performed using Lipofectamine 2000 (Life Technologies, USA) following the manufacturer's protocols. Green fluorescent protein (eGFP) was transfected for laser beam pointing. Experiments were performed 24 h after transfection. We then synthesized the TRPA1 sequence of the corn snake, and the sequence of the corn snake with hot-spring snake-specific replacements. Patch-clamp recordings were used to record whole-cell and excised patch configurations, with sampling at 10–20 kHz. Laser irradiation was used to produce temperature jumps, which increased the temperature quickly and created a gradient.<sup>35</sup> The driving power of the laser was adjusted to produce junction potential measured at different temperatures.

### **References:**

1. Liao, Z. (2018). Thermal Springs and Geothermal Energy in the Qinghai-

- Tibetan Plateau and the Surroundings (Springer Hydrogeology).
2. Hofmann, S., Kraus, S., Dorge, T., et al. (2014). Effects of Pleistocene climatic fluctuations on the phylogeography, demography and population structure of a high-elevation snake species, *Thermophis baileyi*, on the Tibetan Plateau. *J. Biogeogr.* *41*, 2162–2172.
  3. Huang, S., Liu, S. Y., Guo, P., et al. (2009). What are the closest relatives of the hot-spring snakes (Colubridae, *Thermophis*), the relict species endemic to the Tibetan Plateau? *Mol. Phylogenet. Evol.* *51*, 438–446.
  4. Peng, L., Lu, C., Huang, S., et al. (2014). A new species of the genus *Thermophis* (Serpentes: Colubridae) from shangri-la, Northern Yunnan, China, With a proposal for an eclectic rule for species delimitation. *Asian Herpetol. Res.* *5*, 228–239.
  5. Tong, W., Liao, Z., and Liu, S. (1999). *Thermal Springs in Tibet* (Science press).
  6. Li, J.T., Gao, Y.D., Xie, L., et al. (2018). Comparative genomic investigation of high-elevation adaptation in ectothermic snakes. *Proc. Natl. Acad. Sci. U. S. A.* *115*, 8406–8411.
  7. Kajitani, R., Toshimoto, K., Noguchi, H., et al. (2014). Efficient de novo assembly of highly heterozygous genomes from whole-genome shotgun short reads. *Genome Res.* *24*, 1384–1395.
  8. Ye, C., Hill, C.M., Wu, S., et al. (2016). DBG2OLC: Efficient assembly of large genomes using long erroneous reads of the third generation sequencing technologies. *Sci. Rep.* *6*, 31900.
  9. Hu, J., Fan, J., Sun, Z., and Liu, S. (2020). NextPolish: A fast and efficient genome polishing tool for long-read assembly. *Bioinformatics* *36*, 2253–2255.
  10. Waterhouse, R.M., Seppey, M., Simao, F.A., et al. (2018). BUSCO applications from quality assessments to gene prediction and phylogenomics. *Mol. Biol. Evol.* *35*, 543–548.
  11. Durand, N.C., Shamim, M.S., Machol, I., et al. (2016). Juicer Provides a One-Click System for Analyzing Loop-Resolution Hi-C Experiments. *Cell Syst.* *3*, 95–98.
  12. Jacob M. D., Janies, D., Brouwer, C., and Grant, T. (2018). A new strategy to infer circularity applied to four new complete frog mitogenomes. *Ecol. Evol.* *8*, 4011–4018.
  13. Jiang, W., Lv, Y., Cheng, L., et al. (2019). Whole-Genome Sequencing of the Giant Devil Catfish, *Bagarius yarrelli*. *Genome Biol. Evol.* *11*, 2071–2077.
  14. Conesa, A., and Götz, S. (2008). Blast2GO: A comprehensive suite for functional analysis in plant genomics. *Int. J. Plant Genomics* *2008*, 619832.
  15. Bu, D., Luo, H., Huo, P., et al. (2021). KOBAS-i: Intelligent prioritization and exploratory visualization of biological functions for gene enrichment analysis. *Nucleic Acids Res.* *49*, W317–W325.
  16. Emms, D.M., and Kelly, S. (2019). OrthoFinder: Phylogenetic orthology inference for comparative genomics. *Genome Biol.* *20*, 1–14.
  17. Russell, D.J. (2014). *Methods in Molecular Biology: Multiple sequences*

- alignment Methods (Humana press).
18. Capella-Gutiérrez, S., Silla-Martínez, J.M., and Gabaldón, T. (2009). trimAl: A tool for automated alignment trimming in large-scale phylogenetic analyses. *Bioinformatics* 25, 1972–1973.
  19. Yang, Z. (2007). PAML 4: Phylogenetic analysis by maximum likelihood. *Mol. Biol. Evol.* 24, 1586–1591.
  20. Nguyen, L.T., Schmidt, H.A., Von Haeseler, A., and Minh, B.Q. (2015). IQ-TREE: A fast and effective stochastic algorithm for estimating maximum-likelihood phylogenies. *Mol. Biol. Evol.* 32, 268–274.
  21. Han, M.V., Thomas, G.W.C., Lugo-Martinez, J., and Hahn, M.W. (2013). Estimating gene gain and loss rates in the presence of error in genome assembly and annotation using CAFE 3. *Mol. Biol. Evol.* 30, 1987–1997.
  22. Dapper, A.L., and Wade, M.J. (2020). Relaxed Selection and the Rapid Evolution of Reproductive Genes. *Trends Genet.* 36, 640–649.
  23. Cotney, J., Leng, J., Yin, J., et al. (2013). The Evolution of Lineage-Specific Regulatory Activities in the Human Embryonic Limb. *Cell* 154, 185–196.
  24. Feng, S., Stiller, J., Deng, Y., et al. (2020). Dense sampling of bird diversity increases power of comparative genomics. *Nature* 587, 252–257.
  25. Gel, B., Díez-Villanueva, A., Serra, E., et al. (2016). RegioneR: An R/Bioconductor package for the association analysis of genomic regions based on permutation tests. *Bioinformatics* 32, 289–291.
  26. Lee, J., Lee, D., Sim, M., et al. (2018). mySyntenyPortal: An application package to construct websites for synteny block analysis. *BMC Bioinformatics* 19, 1–7.
  27. Kim, J., Farré, M., Auvil, L., et al. (2017). Reconstruction and evolutionary history of eutherian chromosomes. *Proc. Natl. Acad. Sci. U. S. A.* 114, E5379–E5388.
  28. Aguirre-Mesa, A.M., Garcia, M.J., and Millwater, H. (2020). MultiZ: A Library for Computation of High-order Derivatives Using Multicomplex or Multidimensional Numbers. *ACM Trans. Math. Softw.* 46, 23–30.
  29. Prudent, X., Parra, G., Schwede, P., et al. (2016). Controlling for Phylogenetic Relatedness and Evolutionary Rates Improves the Discovery of Associations between Species’ Phenotypic and Genomic Differences. *Mol. Biol. Evol.* 33, 2135–2150.
  30. Hiller, M., Schaar, B.T., Indjeian, V.B., et al. (2012). A “Forward Genomics” Approach Links Genotype to Phenotype using Independent Phenotypic Losses among Related Species. *Cell Rep.* 2, 817–823.
  31. Wu, T., Hu, E., Xu, S., et al. (2021). clusterProfiler 4.0: A universal enrichment tool for interpreting omics data. *Innov.* 2, 100141.
  32. Jumper, J., Evans, R., Pritzel, A., et al. (2021). Highly accurate protein structure prediction with AlphaFold. *Nature* 596, 583–589.
  33. Choi, Y., Sims, G.E., Murphy, S., et al. (2012). Predicting the Functional Effect of Amino Acid Substitutions and Indels. *PLoS One* 7, e46688.
  34. Xu, J., and Zhang, Y. (2010). How significant is a protein structure similarity

- with TM-score = 0.5? *Bioinformatics* 26, 889–895.
35. Yao, J., Liu, B., and Qin, F. (2010). Kinetic and energetic analysis of thermally activated TRPV1 channels. *Biophys. J.* 99, 1743–1753.

## Supplementary Figures:

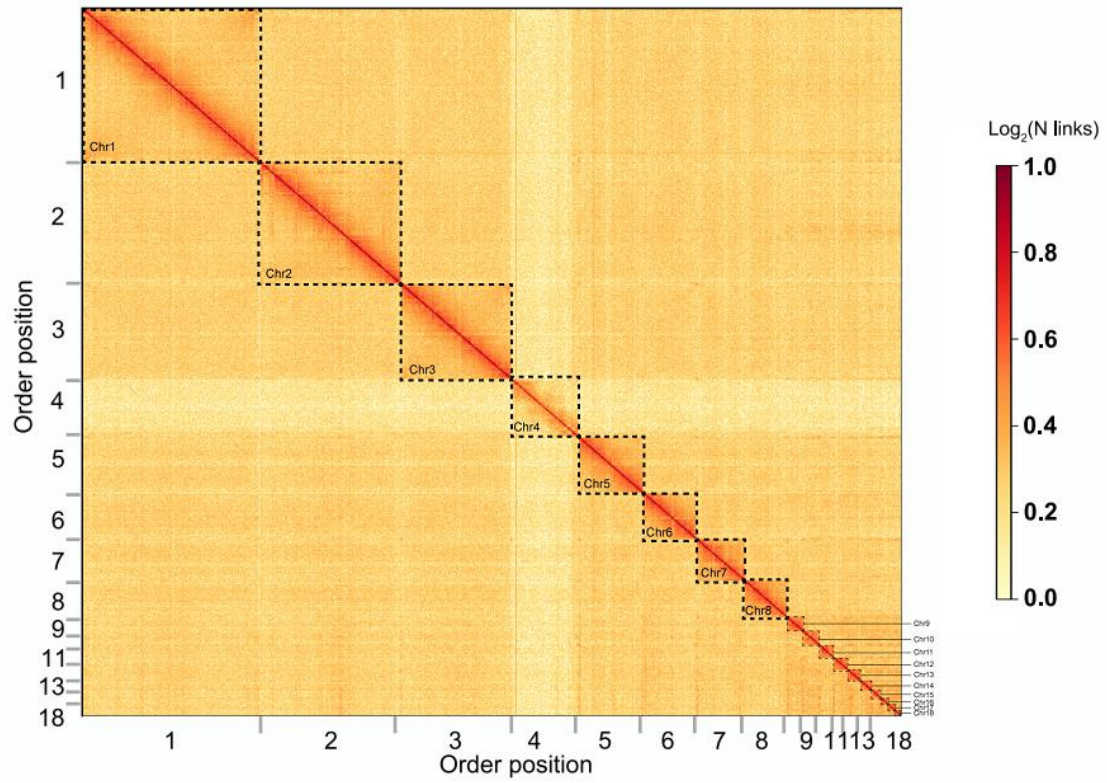

Figure S1. Heat map of chromosomal contacts in *T. baileyi* chromosomes at 500 kb resolution. The fourth cluster (chr4) showing less interaction with other chromosomes is sex chromosome Z.

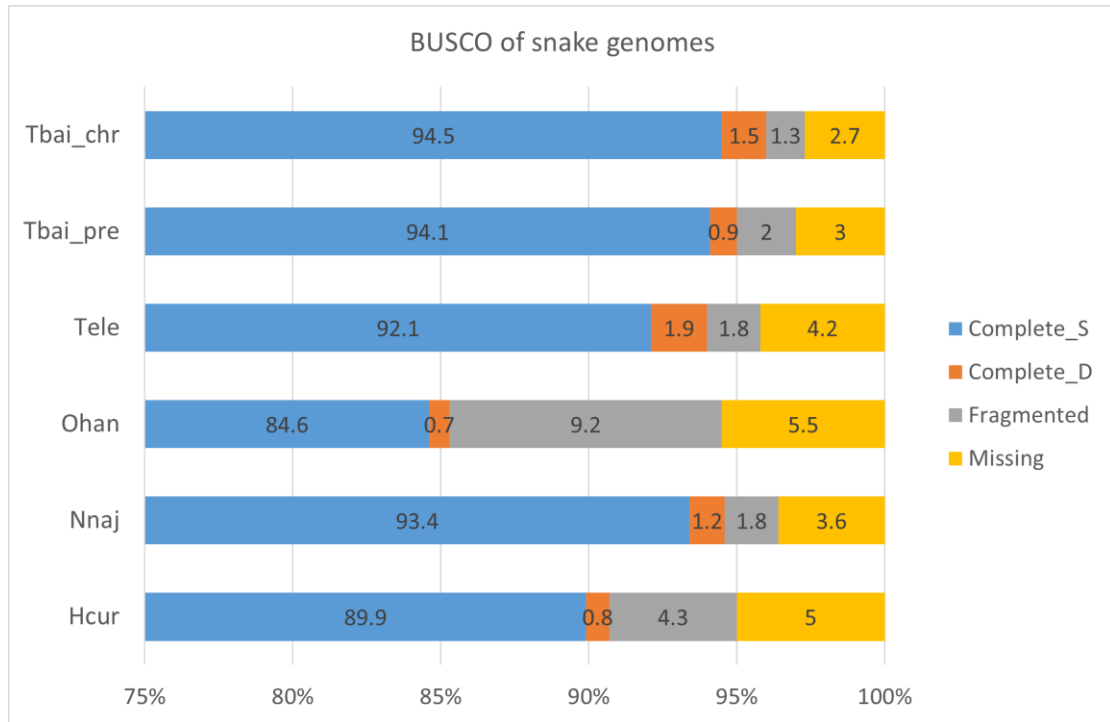

Figure S2. BUSCO assessment of snake genome completeness. Tbai\_pre: previous version *T. baileyi* genome; Tbai\_chr: *T. baileyi* genome in this study; Tele: *Thamnophis elegans*; Ohan: *Ophiophagus hannah*; Nnaj: *Naja naja*; Hcur: *Hydrophis curtus*.



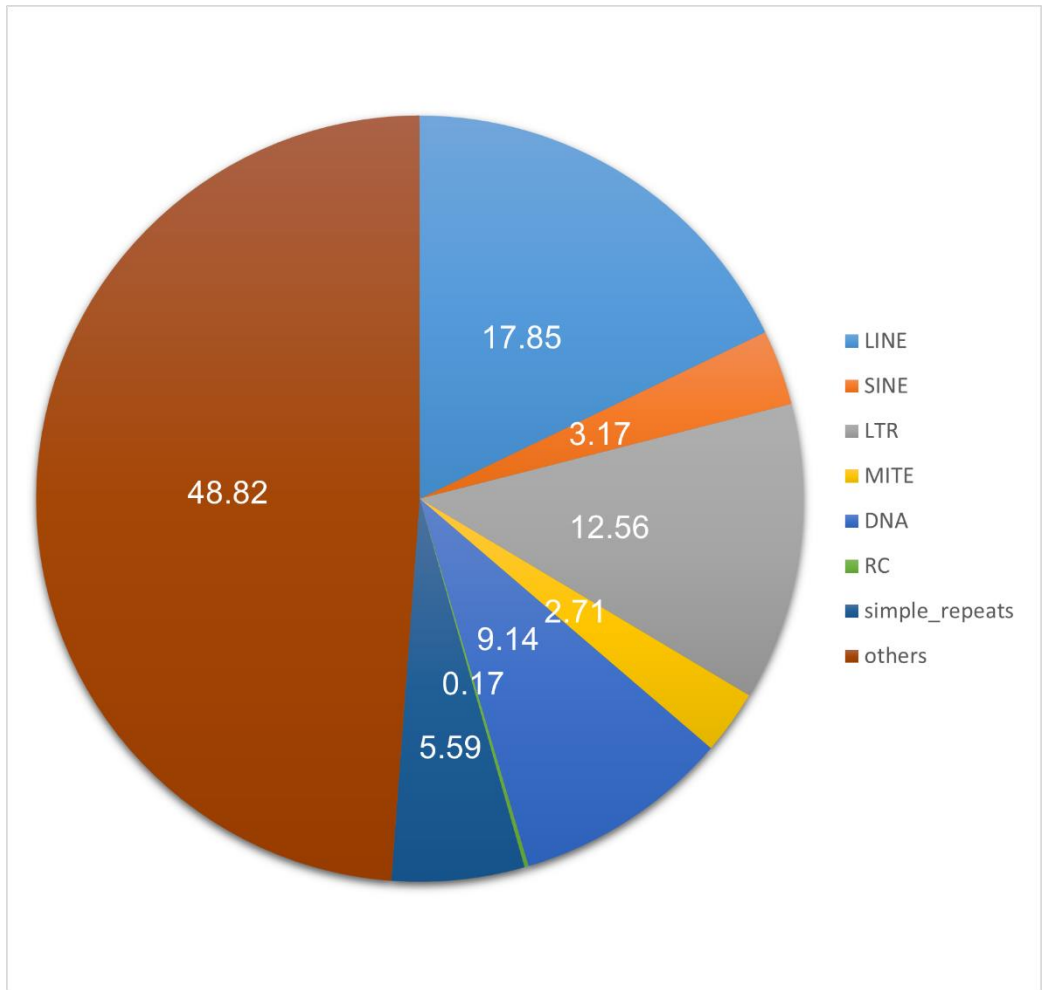

Figure S3. Sequence composition of *T. baileyi* genome. Repetitive sequences occupy 51.18% of the whole genome. The “others” represents non-repetitive sequences. The “simple\_repeats” represents all other repeat sequences in addition to those of Class I (retrotransposons) and Class II (DNA transposons).

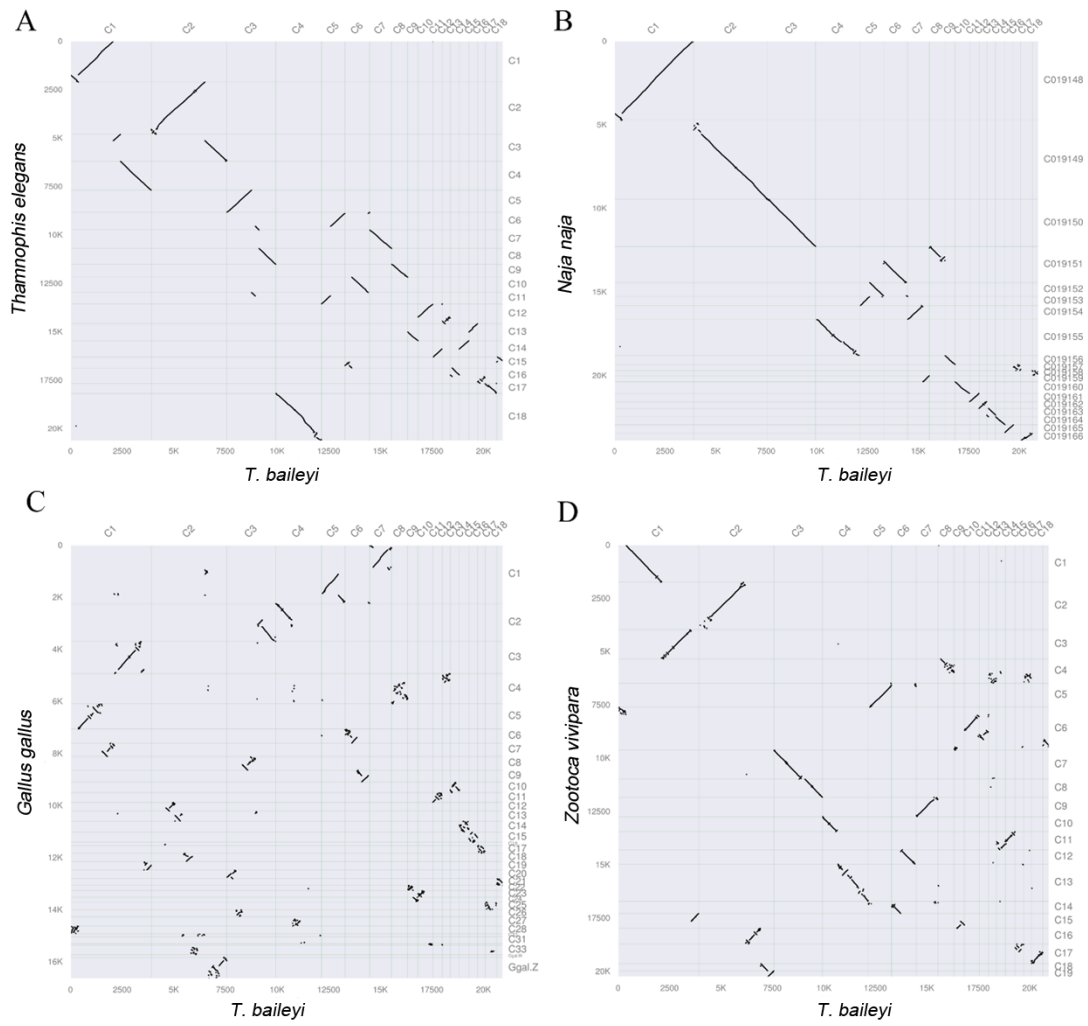

Figure S4. Protein-coding gene-based synteny plots between *T. baileyi* and other vertebrates. Intergenomic comparisons between (A) *T. baileyi* and *Thamnophis elegans*, 15 742 genes were paired. (B) *T. baileyi* and *Naja naja*, 14 701 genes were paired. (C) *T. baileyi* and *Gallus gallus*, 12 416 genes were paired. (D) *T. baileyi* and *Zootoca vivipara* 15 297 genes were paired.

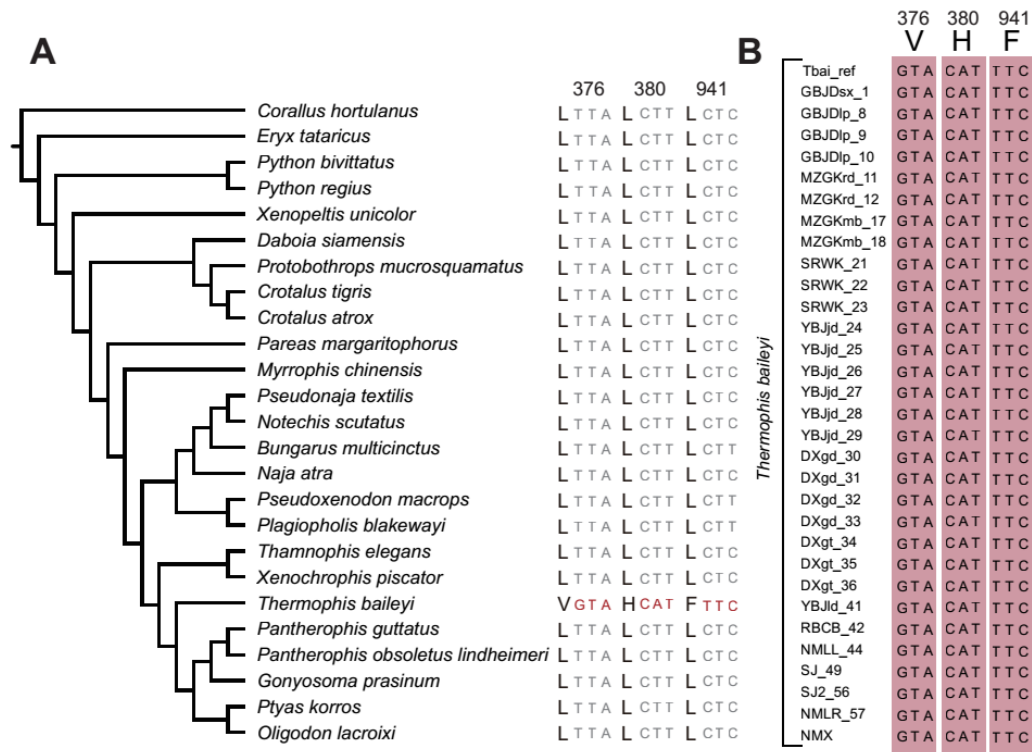

Figure S5. (A) The three TRPA1 mutations (L376V, L380H and L941F) and corresponding nucleotide mutations in *T. baileyi* relative to other snakes. (B) The hot-spring snake-specific TRPA1 replacements are confirmed by 31 *T. baileyi* whole genome re-sequencing data (unpublished data in another manuscript, accession number: CRA005375).

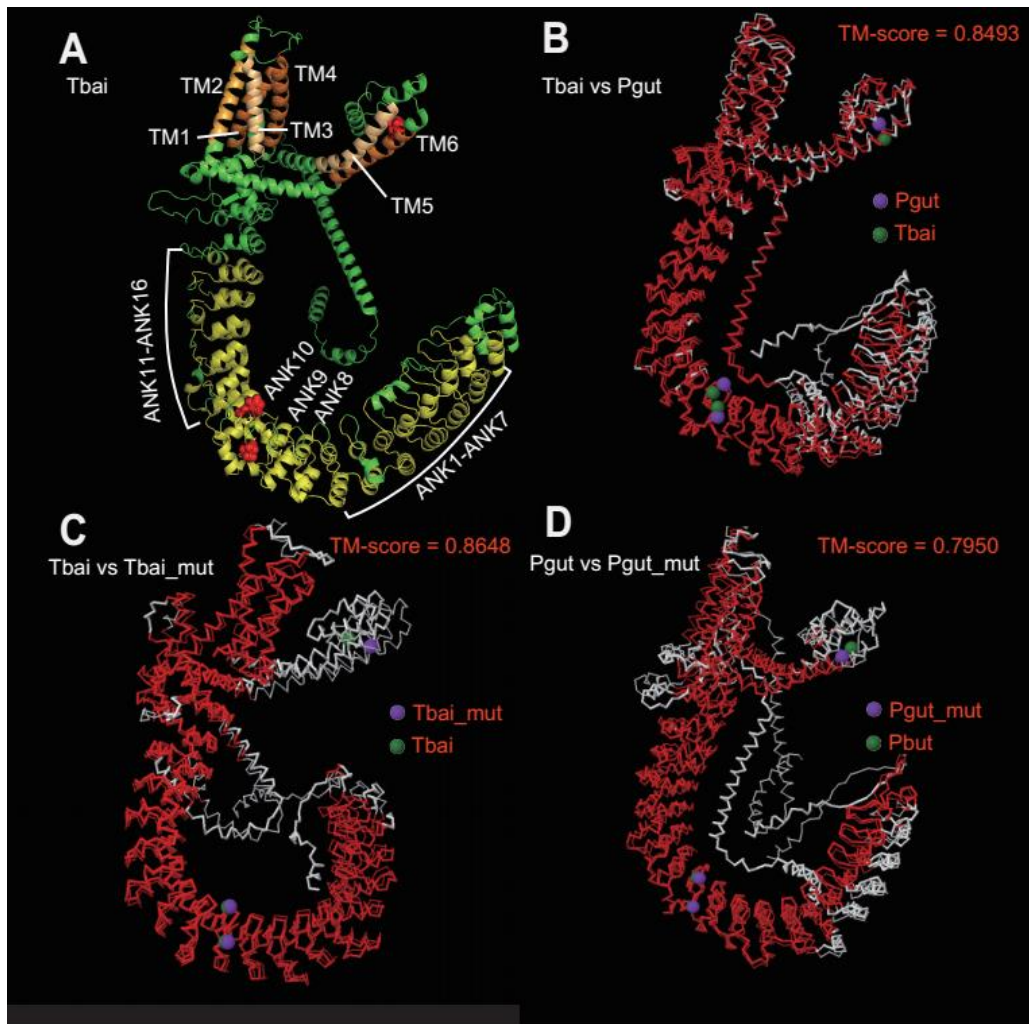

Figure S6. 3D structural modification of TRPA1 associated with the three *T. baileyi* specific variations. (A) 3D structure of *T. baileyi* TRPA1 predicted by AlphaFold2, the 16 ANK domains were in yellow, and the 6 TM domains were in orange and light orange, the names of the domains were marked around these functional domains. (B) superposition of TRPA1 between *T. baileyi* (Tbai, in thick wireframes) and *Pantherophis guttatus* (Pgut, in thin wireframes). The structure of TRPA1 between the two species is conserved. (C) superposition of TRPA1 between *T. baileyi* with three artificial back variations (Tbai\_mut, in thin wireframes) and original *T. baileyi* TRPA1 protein (in thick wireframes). The replacement site in TM6 may alter the spatial conformation of TM5 and TM6. (D) superposition of TRPA1 between *P. guttatus* (in thick wireframes) and *P. guttatus* with the three *T. baileyi* specific variations (Pgut\_mut, in thin wireframes). The replacement sites may alter the spatial conformation of TM5 and TM6, as well as ANK “tail”. The TM-score of these superpositions were depicted on the left top, and residues with  $d < 5\text{\AA}$  are in red, and the amino acid loci of *T. baileyi* specific amino acid variation were marked with green and purple circles.

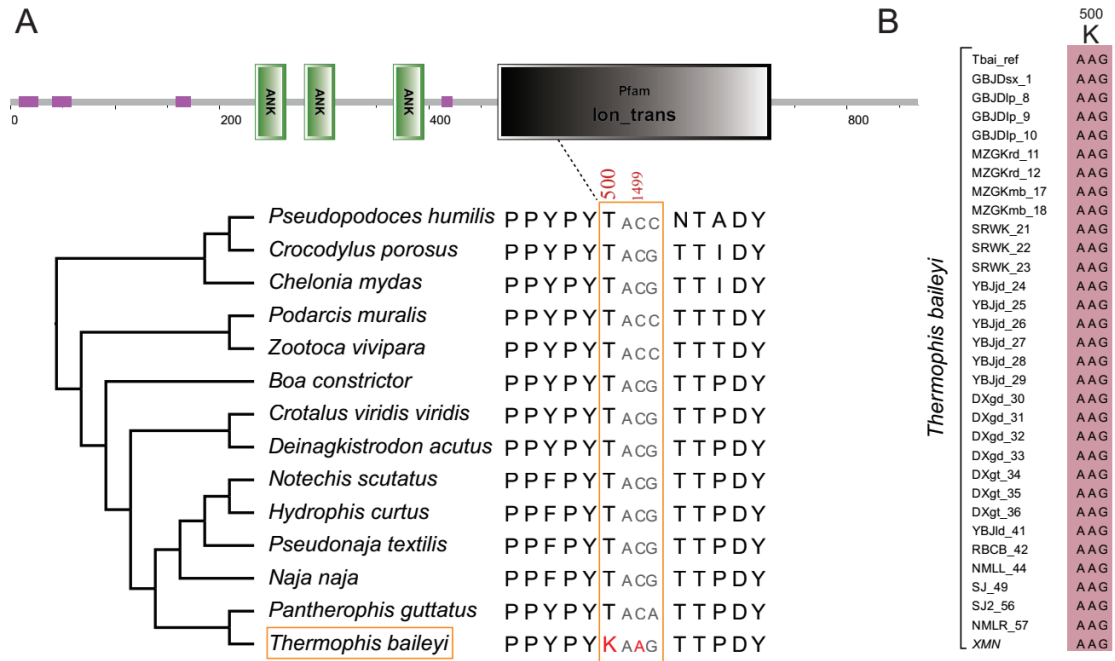

Figure S7. *T. baileyi*-specific variation in TRPV4 genes. (A) The T500K replacement specifically occurred in *T. baileyi* was caused by the C1499A mutation. (B) The hot-spring snake-specific T500K replacement was confirmed by 31 *T. baileyi* whole genome re-sequencing data.

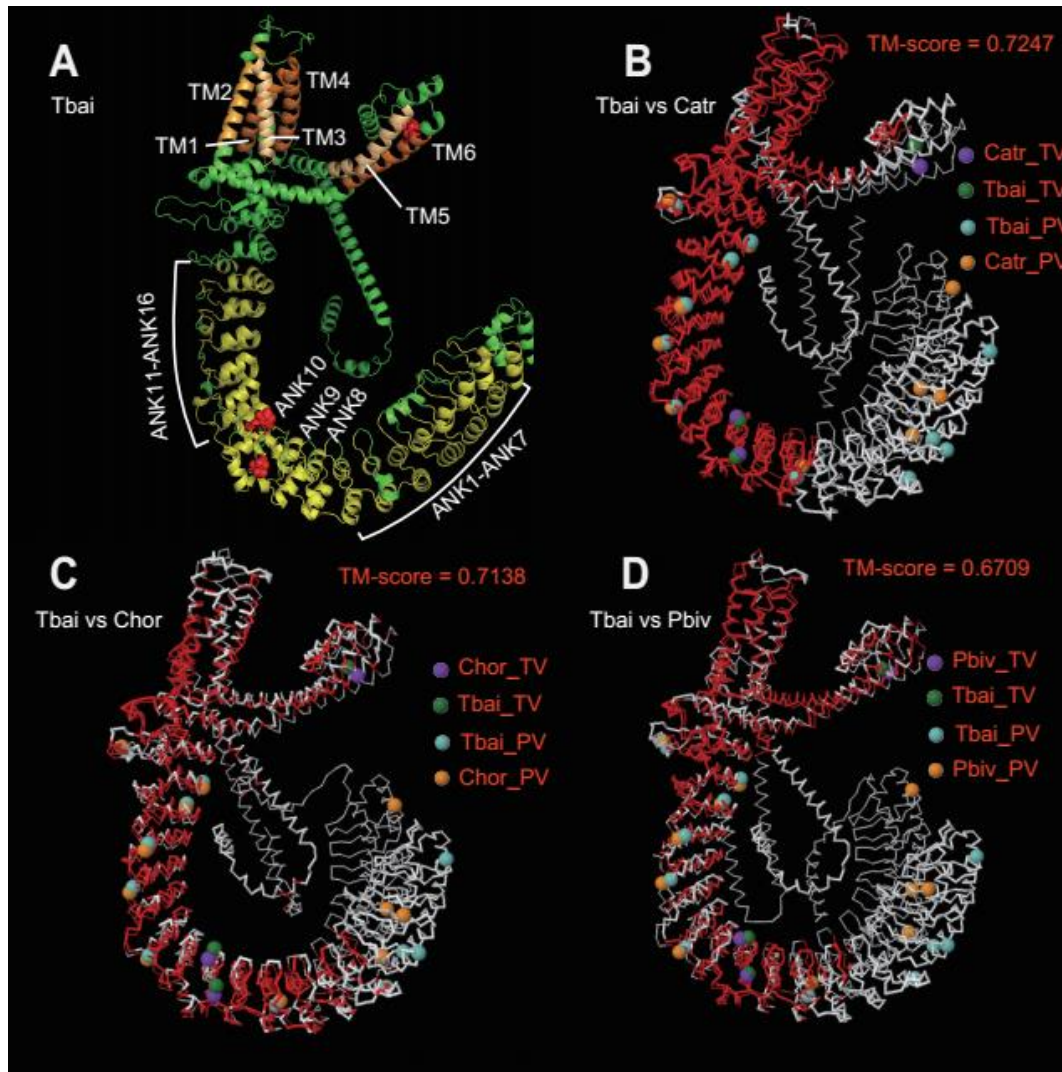

Figure S8. 3D structural modification of TRPA1 associated with *T. baileyi* specific and infrared imaging snake specific variations. (A) 3D structure of *T. baileyi* TRPA1 predicted by AlphaFold2, the 16 ANK domains were in yellow, and the 6 TM domains were in orange and light orange, the names of the domains were marked around functional domains. (B) superposition of TRPA1 between *T. baileyi* (in thick wireframes) and *Crotalus atrox* (Catr) (in thin wireframes). (C) superposition of TRPA1 between *T. baileyi* (in thick wireframes) and *Corallus hortulanus* (Chor) (in thin wireframes). (D) superposition of TRPA1 between *T. baileyi* (in thick wireframes) and *python bivittatus* (Pbiv) (in thin wireframes). The TM-score of these superpositions were depicted on the left top, and residues with  $d < 5\text{\AA}$  were in red, and the amino acid loci of *T. baileyi* specific amino acid variation (with tag “\_TV”) sites and Pit-bearing specific variation (with tag “\_PV”) sites were marked with green/purple and light-blue/orange circles, respectively.

**Supplementary Tables:**

**Table S1. The distribution information of hot-springs that found hot-spring snakes.**

| SID | Lon_S    | Lat_S    | Elev_S | Thermal Spring | Lon_T    | Lat_T    | Elev_T | Temp (°C) |
|-----|----------|----------|--------|----------------|----------|----------|--------|-----------|
| S1  | 86.61667 | 29.13333 | 4,412  | Tt26           | 86.61111 | 29.16806 | 4,400  | 23        |
| S2  | 87.45    | 29.40694 | 4,446  | Th25           | 87.45    | 29.40694 | 4,480  | 75        |
| S3  | 87.565   | 28.91    | 4,641  | Th30           | 87.565   | 28.91    | 4,600  | 45        |
| S4  | 87.74026 | 29.0734  | 4,016  | Th31           | 87.74028 | 29.07361 | 3,995  | 50        |
| S5  | 88.17085 | 28.82688 | 4,621  | Th26           | 87.42778 | 29.09028 | 4,200  | 76        |
| S6  | 89.25163 | 30.13595 | 4,562  | Geda           | 89.25163 | 30.13595 | 4,562  | 30        |
| S7  | 89.38486 | 29.90155 | 4,336  | Th45           | 89.38889 | 29.9     | 4,500  | 82        |
| S8  | 89.63333 | 29.71111 | 4,702  | Tb31           | 89.63333 | 29.71111 | 4,450  | > 84      |
| S9  | 90.05    | 29.10972 | 4,136  | Th53           | 90.05    | 29.10972 | 4,000  | 60        |
| S10 | 90.28782 | 29.84806 | 4,609  | Tb33           | 90.37139 | 29.73472 | 4,600  | 90        |
| S11 | 90.35222 | 29.98056 | 4,413  | Th58           | 90.35222 | 29.98056 | 4,400  | 78        |
| S12 | 90.59306 | 30.2     | 4,617  | Th57           | 90.59306 | 30.2     | 4,480  | 46.5      |
| S13 | 90.9432  | 30.41333 | 4,250  | Tb36           | 90.94444 | 30.41278 | 4,250  | > 87      |
| S14 | 91.23394 | 30.62081 | 4,549  | Th55           | 91.23333 | 30.61861 | 4,630  | 67        |
| S15 | 92.16667 | 30.15278 | 4,441  | Th64           | 92.16667 | 30.15278 | 4,350  | 46        |
| S16 | 92.24091 | 29.69332 | 4,379  | Tw24           | 92.26111 | 29.68611 | 4,380  | 36        |
| S17 | 92.31536 | 29.38176 | 3,909  | Th123          | 92.31528 | 29.3875  | 3,920  | 50.5      |
| S18 | 92.49961 | 29.89313 | 4,209  | Tw56           | 92.48806 | 29.89583 | 4,200  | 43        |
| S19 | 93.1755  | 30.20246 | 3,962  | Sangla         | 93.1755  | 30.20246 | 3,962  | 30        |
| S20 | 93.34408 | 29.73553 | 3,683  | Tw57           | 93.34444 | 29.73417 | 3,660  | 43        |

**Note:** SID: sample ID of *T. baileyi*; Lon\_S: longitude of sample; Lat\_S: latitude of sample; Elev\_S: elevation of sample; Lon\_T: longitude of thermal spring site; Lat\_T: latitude of thermal spring site; Elev\_T: elevation of thermal spring site; Temp: temperature of thermal spring site. The distribution of hot-springs was collected from published records (see the Method section). The hot-spring snake's distribution information was collected from the collection of specimens (Herpetological Museum, Chengdu Institute of Biology, Chinese Academy of Sciences, Chengdu, China) and combined with the published information (see the Method section).



**Table.S2 Geographic information of *T. baileyi* collected in specimen and relative literatures.**

| Sample ID | longitude | latitude | attitude | Source               |
|-----------|-----------|----------|----------|----------------------|
| GBJDsx_1  | 93.34     | 29.74    | 3,709    | Specimens            |
| GBJDlp_9  | 93.18     | 30.2     | 3,961    | Specimens            |
| MZGKrd_11 | 92.28     | 29.69    | 4,450    | Specimens            |
| MZGKmb_17 | 92.14     | 30.15    | 4,531    | Specimens            |
| MZGKmb_18 | 92.14     | 30.15    | 4,531    | Specimens            |
| SRWK_21   | 92.29     | 29.36    | 3,893    | Specimens            |
| YBJjd_24  | 90.35     | 29.98    | 4,417    | Specimens            |
| YBJjd_25  | 90.35     | 29.98    | 4,417    | Specimens            |
| YBJjd_26  | 90.35     | 29.98    | 4,417    | Specimens            |
| DXgd_30   | 90.29     | 29.85    | 4,578    | Specimens            |
| DXgd_31   | 90.29     | 29.85    | 4,578    | Specimens            |
| DXgd_32   | 90.29     | 29.85    | 4,578    | Specimens            |
| DXgt_34   | 91.23     | 30.62    | 4,549    | Specimens            |
| DXgt_35   | 91.23     | 30.62    | 4,549    | Specimens            |
| DXgt_36   | 91.23     | 30.62    | 4,549    | Specimens            |
| YBJld_41  | 90.65     | 30.16    | 4,853    | Specimens            |
| RBCB_42   | 90.06     | 29.11    | 4,116    | Specimens            |
| NMLL_44   | 89.38     | 29.9     | 4,365    | Specimens            |
| SJ_49     | 88.17     | 28.83    | 4,609    | Specimens            |
| SJ2_56    | 88.14     | 28.84    | 4,536    | Specimens            |
| NMLR_57   | 89.24     | 30.13    | 4,629    | Specimens            |
| GBJDlp_8  | 93.18     | 30.2     | 3,961    | Specimens            |
| GBJDlp_10 | 93.18     | 30.2     | 3,961    | Specimens            |
| MZGKrd_12 | 92.28     | 29.69    | 4,450    | Specimens            |
| SRWK_22   | 92.29     | 29.36    | 3,893    | Specimens            |
| SRWK_23   | 92.29     | 29.36    | 3,893    | Specimens            |
| YBJjd_27  | 90.35     | 29.98    | 4,417    | Specimens            |
| YBJjd_28  | 90.35     | 29.98    | 4,417    | Specimens            |
| YBJjd_29  | 90.35     | 29.98    | 4,417    | Specimens            |
| DXgd_33   | 90.29     | 29.85    | 4,578    | Specimens            |
| NMX       | 90.22     | 29.41    | 3,790    | Specimens            |
| H25       | 29.1      | 86.6     | 4,323    | Hofmann et al., 2014 |
| H26       | 29.4      | 87.4     | 4,155    | Hofmann et al., 2014 |
| H27       | 28.9      | 87.6     | 4,596    | Hofmann et al., 2014 |
| H28       | 29.1      | 87.7     | 4,013    | Hofmann et al., 2014 |
| H29       | 28.8      | 88.2     | 4,602    | Hofmann et al., 2014 |
| H30       | 29.9      | 89.1     | 4,256    | Hofmann et al., 2014 |
| H31       | 29.9      | 89.4     | 4,372    | Hofmann et al., 2014 |
| H32       | 29.7      | 89.6     | 4,386    | Hofmann et al., 2014 |
| H33       | 29.1      | 90.1     | 4,087    | Hofmann et al., 2014 |



|     |       |       |       |                      |
|-----|-------|-------|-------|----------------------|
| H34 | 29.9  | 90.4  | 4,395 | Hofmann et al., 2014 |
| H35 | 30    | 90.4  | 4,395 | Hofmann et al., 2014 |
| H36 | 30.2  | 90.7  | 4,887 | Hofmann et al., 2014 |
| H37 | 30.4  | 90.9  | 4,210 | Hofmann et al., 2014 |
| H38 | 30.6  | 91.2  | 4,333 | Hofmann et al., 2014 |
| H39 | 30.2  | 92.2  | 4,425 | Hofmann et al., 2014 |
| H40 | 29.7  | 92.2  | 4,382 | Hofmann et al., 2014 |
| H41 | 29.4  | 92.3  | 3,904 | Hofmann et al., 2014 |
| H42 | 29.9  | 92.5  | 4,167 | Hofmann et al., 2014 |
| H43 | 30.2  | 93.2  | 3,928 | Hofmann et al., 2014 |
| H44 | 29.7  | 93.3  | 3,652 | Hofmann et al., 2014 |
| H45 | 30.06 | 90.49 | 4,100 | Huang et al., 2009   |

Notes: All the hot-spring snake specimens information were collected from the Herpetological Museum, Chengdu Institute of Biology, Chinese Academy of Sciences, Chengdu, China.

**Table S3. Sequencing Data for *T. baileyi* genome *de novo* assembly.**

| platform         | Category                                   | Information     |
|------------------|--------------------------------------------|-----------------|
| PacBio           | Subreads reads                             | 15,319,559      |
|                  | Subreads base                              | 204,159,818,114 |
|                  | Average subreads length                    | 13,326.74       |
|                  | Max Subreads length                        | 145,876         |
|                  | Accuracy                                   | 0.8000          |
|                  | Subreads n50                               | 21,712          |
|                  | GC mean                                    | 0.4300          |
| Hi-C<br>Illumina | Read Length (bp)                           | 50              |
|                  | Raw Paired-end Reads                       | 669,432,650     |
|                  | Raw Bases (bp)                             | 200,829,795,000 |
|                  | Clean Paired-end Reads                     | 658,916,714     |
|                  | Clean Paired-end Reads Rate (%)            | 98.43           |
|                  | Low-quality Paired-end Reads               | 4,259,028       |
|                  | Low-quality Paired-end Reads Rate (%)      | 0.64            |
|                  | Ns Paired-end Reads                        | 119             |
|                  | Ns Paired-end Reads Rate (%)               | 0.0             |
|                  | Adapter Polluted Paired-end Reads          | 6,256,789       |
|                  | Adapter Polluted Paired-end Reads Rate (%) | 0.93            |
|                  | Raw Q30 Bases Rate (%)                     | 90.45           |
|                  | Clean Q30 Bases Rate (%)                   | 93.66           |

Notes: the Illumina pair-end data from our previous study was used.<sup>6</sup>

**Table S4. Quality metrics for *T. baileyi* genome compared to other published snake genomes.**

| species                                         | Size (Gb)   | Scaffold N50 (bp)  | Contig N50 (bp)  | BUSCO         |
|-------------------------------------------------|-------------|--------------------|------------------|---------------|
| <b><i>Thermophis baileyi</i></b>                | <b>1.85</b> | <b>139,893,437</b> | <b>4,023,894</b> | <b>97.10%</b> |
| <i>Thermophis baileyi</i><br>(previous version) | 1.74        | 2,413,955          | 16,800           | 97.0%         |
| <i>Boa constrictor</i>                          | 1.45        | 16,597,778         | 47,284           | 94.10%        |
| <i>Python bivittatus</i>                        | 1.44        | 213,970            | 10,658           | 88.50%        |
| <i>Notechis scutatus</i>                        | 1.67        | 5,997,050          | 31,763           | 86.60%        |
| <i>Ophiophagus Hannah</i>                       | 1.59        | 241,519            | 5,201            | 85.50%        |
| <i>Pseudonaja textilis</i>                      | 1.59        | 14,685,528         | 50,443           | 87.40%        |
| <i>Crotalus viridis</i>                         | 1.34        | 139,167            | 15,735           | 83.30%        |
| <i>Naja naja</i>                                | 1.77        | 224,088,900        | 302,474          | 89.50%        |
| <i>Hydrophis curtus</i>                         | 1.62        | 1,346,643          | 183,470          | 91.10%        |
| <i>Deinagkistrodon acutus</i>                   | 1.47        | 2,122,253          | 22,424           | -             |
| <i>Protobothrops flavoviridis</i>               | 1.41        | 467,050            | 3,798            | 92.7%         |

Notes: the previous version of assembly is from our previous study.<sup>6</sup>

**Table S5. Comparison of gene structure and function annotation between previous and update *T. baileyi* genome.**

|                           | Tbai_pre  | Tbai_chr  | <i>P</i> -value of t.test |
|---------------------------|-----------|-----------|---------------------------|
| Average length of exons   | 213.4788  | 224.2122  | < 2.2e-16                 |
| Average length of introns | 2,769.333 | 3,851.796 | < 2.2e-16                 |
| Average length of genes   | 24,496.51 | 32,007.81 | < 2.2e-16                 |
| number of exons           | 191,915   | 195,679   |                           |
| number of genes           | 20,995    | 22,242    |                           |
| number of introns         | 170,920   | 173,437   |                           |
| Annotated in Swissprot    | 18,978    | 19,277    |                           |
| Annotated in NR(NCBI)     | 19,832    | 20,323    |                           |

Notes: Average length of exons, introns and genes were significantly longer than in the previous genome edition. The total number of structure annotated genes, as well as functionally annotated genes in the public database is increased.

**Table S6. GO enrichment of EBR related genes.**

| GO ID      | Term names                                                             | <i>P</i> -adjust |
|------------|------------------------------------------------------------------------|------------------|
| GO:0045095 | keratin filament                                                       | 4.51E-13         |
| GO:0002474 | antigen processing and presentation of peptide antigen via MHC class I | 9.17E-08         |
| GO:0032611 | interleukin-1 beta production                                          | 9.17E-08         |
| GO:0032620 | interleukin-17 production                                              | 1.88E-07         |
| GO:0042612 | MHC class I protein complex                                            | 2.04E-07         |
| GO:0002367 | cytokine production involved in immune response                        | 2.04E-07         |
| GO:0031424 | keratinization                                                         | 2.35E-05         |
| GO:0050829 | defense response to Gram-negative bacterium                            | 3.08E-05         |
| GO:0005882 | intermediate filament                                                  | 0.000974         |
| GO:0070268 | cornification                                                          | 0.002089         |
| GO:1901585 | regulation of acid-sensing ion channel activity                        | 0.004131         |
| GO:0004745 | retinol dehydrogenase activity                                         | 0.004355         |
| GO:0003677 | DNA binding                                                            | 0.004355         |
| GO:0098793 | presynapse                                                             | 0.019258         |
| GO:0044829 | positive regulation by host of viral genome replication                | 0.029051         |
| GO:0005783 | endoplasmic reticulum                                                  | 0.037057         |
| GO:0034338 | short-chain carboxylesterase activity                                  | 0.038794         |
| GO:0009056 | catabolic process                                                      | 0.038794         |
| GO:0070895 | negative regulation of transposon integration                          | 0.038794         |

**Table S7. Evolutionary changes in high altitude adaptation related genes.**

(Excel Table)

**Table S8. GO enrichment of common rapidly evolving genes among high-altitude species.**

(Excel Table)

**Table S9. KEGG enrichment of common rapidly evolving genes among high-altitude species.**

| KEGG name                                            | ID     | <i>p</i> -adjust |
|------------------------------------------------------|--------|------------------|
| Metabolic pathways                                   | k01100 | 3.30E-12         |
| MAPK signaling pathway                               | k04010 | 7.30E-10         |
| PI3K-Akt signaling pathway                           | k04151 | 1.56E-06         |
| Pathways in cancer                                   | k05200 | 5.91E-06         |
| Rap1 signaling pathway                               | k04015 | 1.72E-05         |
| Focal adhesion                                       | k04510 | 2.39E-05         |
| Transcriptional misregulation in cancer              | k05202 | 9.17E-05         |
| Regulation of actin cytoskeleton                     | k04810 | 0.000189308      |
| EGFR tyrosine kinase inhibitor resistance            | k01521 | 0.000771625      |
| Ras signaling pathway                                | k04014 | 0.001186636      |
| Hepatitis B                                          | k05161 | 0.001293284      |
| AGE-RAGE signaling pathway in diabetic complications | k04933 | 0.001361115      |
| Phospholipase D signaling pathway                    | k04072 | 0.001442728      |
| Protein processing in endoplasmic reticulum          | k04141 | 0.00145693       |
| Proteoglycans in cancer                              | k05205 | 0.00168059       |
| Yersinia infection                                   | k05135 | 0.002005367      |
| Cholesterol metabolism                               | k04979 | 0.002078751      |
| Prostate cancer                                      | k05215 | 0.003358321      |
| Epstein-Barr virus infection                         | k05169 | 0.003713852      |
| FoxO signaling pathway                               | k04068 | 0.004000239      |
| NF-kappa B signaling pathway                         | k04064 | 0.004098434      |
| Neurotrophin signaling pathway                       | k04722 | 0.005084722      |
| T cell receptor signaling pathway                    | k04660 | 0.005127997      |
| Lysine degradation                                   | k00310 | 0.005268852      |
| Inositol phosphate metabolism                        | k00562 | 0.005576324      |
| Parathyroid hormone synthesis, secretion and action  | k04928 | 0.006049873      |
| Glycerolipid metabolism                              | k00561 | 0.006124127      |
| Th17 cell differentiation                            | k04659 | 0.0062812        |
| NOD-like receptor signaling pathway                  | k04621 | 0.006720263      |
| Small cell lung cancer                               | k05222 | 0.007100647      |
| Fc gamma R-mediated phagocytosis                     | k04666 | 0.007446968      |
| Toxoplasmosis                                        | k05145 | 0.008797727      |
| Acute myeloid leukemia                               | k05221 | 0.008797727      |
| Glycerophospholipid metabolism                       | k00564 | 0.008797727      |
| Choline metabolism in cancer                         | k05231 | 0.009786539      |
| Phosphatidylinositol signaling system                | k04070 | 0.009786539      |
| Human papillomavirus infection                       | k05165 | 0.010126579      |
| Tight junction                                       | k04530 | 0.010126579      |

|                                                                   |        |             |
|-------------------------------------------------------------------|--------|-------------|
| Epithelial cell signaling in <i>Helicobacter pylori</i> infection | k05120 | 0.011351488 |
| Porphyrin and chlorophyll metabolism                              | k00860 | 0.011351488 |
| Colorectal cancer                                                 | k05210 | 0.011351488 |
| Gap junction                                                      | k04540 | 0.012989967 |
| Longevity regulating pathway                                      | k04211 | 0.013602879 |
| Cellular senescence                                               | k04218 | 0.014009151 |
| Human T-cell leukemia virus 1 infection                           | k05166 | 0.014470883 |
| Gastric acid secretion                                            | k04971 | 0.015060862 |
| GnRH signaling pathway                                            | k04912 | 0.016832549 |
| Gastric cancer                                                    | k05226 | 0.019148968 |
| Oxytocin signaling pathway                                        | k04921 | 0.022273769 |
| Glycosylphosphatidylinositol (GPI)-anchor biosynthesis            | k00563 | 0.024412668 |
| Insulin signaling pathway                                         | k04910 | 0.025215354 |
| ErbB signaling pathway                                            | k04012 | 0.02691036  |
| Chagas disease (American trypanosomiasis)                         | k05142 | 0.027576351 |
| ECM-receptor interaction                                          | k04512 | 0.028173193 |
| Fanconi anemia pathway                                            | k03460 | 0.028258152 |
| C-type lectin receptor signaling pathway                          | k04625 | 0.028628054 |
| Human cytomegalovirus infection                                   | k05163 | 0.030484598 |
| Hypertrophic cardiomyopathy (HCM)                                 | k05410 | 0.031808325 |
| Fatty acid metabolism                                             | k01212 | 0.031923485 |
| HIF-1 signaling pathway                                           | k04066 | 0.033057447 |
| Thermogenesis                                                     | k04714 | 0.035618116 |
| Non-alcoholic fatty liver disease (NAFLD)                         | k04932 | 0.035618116 |
| Chronic myeloid leukemia                                          | k05220 | 0.035912229 |
| Leukocyte transendothelial migration                              | k04670 | 0.03664993  |
| MicroRNAs in cancer                                               | k05206 | 0.036887623 |
| Basal transcription factors                                       | k03022 | 0.037959413 |
| Vascular smooth muscle contraction                                | k04270 | 0.037959413 |
| Antifolate resistance                                             | k01523 | 0.038208686 |
| Calcium signaling pathway                                         | k04020 | 0.038617048 |
| mTOR signaling pathway                                            | k04150 | 0.039618232 |
| Endocrine resistance                                              | k01522 | 0.04236655  |
| Apoptosis                                                         | k04210 | 0.04236655  |
| Notch signaling pathway                                           | k04330 | 0.044712698 |
| Tuberculosis                                                      | k05152 | 0.046289201 |
| Inflammatory mediator regulation of TRP channels                  | k04750 | 0.046290161 |
| Malaria                                                           | k05144 | 0.047548687 |



**Table S10. GO enrichment of expanded gene families in *T. baileyi*.**

(Excel Table)

**Table S11. Evolutionary changes in hot-spring snake TRP genes.**

| Gene ID                 | Gene name | EBR | CNE | UNIQ | PSG | REG | Species-specific replacements | Common rapidly evolving genes |
|-------------------------|-----------|-----|-----|------|-----|-----|-------------------------------|-------------------------------|
| Tbai_Scaffold30_G00069  | TRPA1     | 0   | 0   | 1    | 0   | 0   | 1                             | 0                             |
| Tbai_Scaffold43_G00023  | TRPC1     | 0   | 0   | 0    | 0   | 0   | 0                             | 1                             |
| Tbai_Scaffold149_G00019 | TRPC4AP   | 0   | 0   | 0    | 1   | 1   | 0                             | 1                             |
| Tbai_Scaffold306_G00001 | TRPC5     | 1   | 0   | 0    | 0   | 0   | 0                             | 0                             |
| Tbai_Scaffold196_G00018 | TRPC6     | 0   | 0   | 0    | 0   | 0   | 0                             | 1                             |
| Tbai_Scaffold485_G00003 | TRPC7     | 0   | 0   | 1    | 0   | 1   | 0                             | 0                             |
| Tbai_Scaffold151_G00038 | TRPM1     | 0   | 0   | 0    | 0   | 1   | 0                             | 0                             |
| Tbai_Scaffold42_G00048  | TRPM5     | 0   | 0   | 1    | 0   | 0   | 0                             | 1                             |
| Tbai_Scaffold37_G00094  | TRPM7     | 0   | 1   | 1    | 0   | 0   | 0                             | 0                             |
| Tbai_Scaffold571_G00004 | TRPM8     | 0   | 0   | 0    | 0   | 0   | 0                             | 1                             |
| Tbai_Scaffold312_G00014 | TRPV3     | 0   | 0   | 0    | 0   | 1   | 0                             | 0                             |
| Tbai_Scaffold115_G00029 | TRPV4     | 0   | 0   | 0    | 0   | 0   | 1                             | 0                             |

EBR: Evolutionary break region related genes; CNE: Conserved non-coding element related genes; UNIQ: *T. baileyi*-specific genome region related genes; PSG: Positively selected genes; REG: Rapidly evolving genes.

**Table S12. Functional prediction of TRPA1 and TRPV4 genes using PROVEAN**

| genes | substitution | PROVEAN score | Prediction (cutoff = -2.5) |
|-------|--------------|---------------|----------------------------|
| TRPA1 | L376V        | -0.258        | Neutral                    |
| TRPA1 | L380H        | -3.317        | Deleterious                |
| TRPA1 | L941F        | -3.19         | Deleterious                |
| TRPV4 | T500K        | -0.291        | Neutral                    |

Notes: the cutoff score is -2.5. When the PROVEAN score is larger than -2.5, it is classified as neutral; when the PROVEAN score is smaller than -2.5, it is classified as deleterious.

**Table S13. GO enrichment of hot-spring snake unique genes**

(Excel Table)

**Table S14. GO enrichments of CNE related genes**

| GO ID      | Term name                                                                | p-adjusted |
|------------|--------------------------------------------------------------------------|------------|
| GO:0009952 | anterior/posterior pattern specification                                 | 1.59E-08   |
| GO:0048704 | embryonic skeletal system morphogenesis                                  | 0.00461    |
| GO:0000981 | DNA-binding transcription factor activity, RNA polymerase II-specific    | 0.00718    |
| GO:0007416 | synapse assembly                                                         | 0.02015    |
| GO:0000122 | negative regulation of transcription by RNA polymerase II                | 0.02035    |
| GO:0007399 | nervous system development                                               | 0.02452    |
| GO:0000790 | nuclear chromatin                                                        | 0.02751    |
| GO:0050953 | sensory perception of light stimulus                                     | 0.02751    |
| GO:0030426 | growth cone                                                              | 0.02751    |
| GO:0033674 | positive regulation of kinase activity                                   | 0.02751    |
| GO:0010842 | retina layer formation                                                   | 0.02751    |
| GO:0048666 | neuron development                                                       | 0.02751    |
| GO:0035116 | embryonic hindlimb morphogenesis                                         | 0.02751    |
| GO:0046974 | histone methyltransferase activity (H3-K9 specific)                      | 0.02751    |
| GO:0001228 | DNA-binding transcription activator activity, RNA polymerase II-specific | 0.02751    |
| GO:0006468 | protein phosphorylation                                                  | 0.02807    |
| GO:0016604 | nuclear body                                                             | 0.02807    |
| GO:0007156 | homophilic cell adhesion via plasma membrane adhesion molecules          | 0.03431    |
| GO:0098684 | photoreceptor ribbon synapse                                             | 0.03431    |
| GO:0000978 | RNA polymerase II cis-regulatory region sequence-specific DNA binding    | 0.03431    |
| GO:0005001 | transmembrane receptor protein tyrosine phosphatase activity             | 0.04844    |

**Table S15. Genome data used in this study.**

| Deposited data                      | Abbreviation | Source     | Accession NO./website                                                                                                                     |
|-------------------------------------|--------------|------------|-------------------------------------------------------------------------------------------------------------------------------------------|
| <i>Thermophis baileyi</i>           | Tbai         | This Paper | <a href="https://ngdc.cnpc.ac.cn">https://ngdc.cnpc.ac.cn</a> , PRJCA007342                                                               |
| <i>Pseudonaja textilis</i>          | Ptex         | NCBI       | GCA_900608585.1                                                                                                                           |
| <i>Pantherophis guttatus</i>        | Pgut         | NCBI       | GCF_001185365.1                                                                                                                           |
| <i>Protobothrops mucrosquamatus</i> | Pmuc         | NCBI       | GCF_001527695.2                                                                                                                           |
| <i>Ophiophagus hannah</i>           | Ohan         | NCBI       | GCA_000516915.1                                                                                                                           |
| <i>Python bivittatus</i>            | Pbiv         | NCBI       | GCF_000186305.1                                                                                                                           |
| <i>Thamnophis sirtalis</i>          | Tsir         | NCBI       | GCF_001077635.1                                                                                                                           |
| <i>Crotalus viridis viridis</i>     | Cvir         | NCBI       | GCA_003400415.2                                                                                                                           |
| <i>Notechis scutatus</i>            | Nscu         | NCBI       | GCF_900518725.1                                                                                                                           |
| <i>Deinagkistrodon acutus</i>       | Dacu         | GigaBase   | <a href="ftp.cngb.org/pub/gigadb/pub/10.5524/10001_101000/100196/">ftp.cngb.org/pub/gigadb/pub/10.5524/10001_101000/100196/</a>           |
| <i>Thamnophis elegans</i>           | Tele         | NCBI       | GCF_009769535.1                                                                                                                           |
| <i>Naja naja</i>                    | Nnaj         | NCBI       | GCA_009733165.1                                                                                                                           |
| <i>Boa constrictor</i>              | Bcon         | figshare   | <a href="https://doi.org/10.6084/m9.figshare.9793013.v2">https://doi.org/10.6084/m9.figshare.9793013.v2</a>                               |
| <i>Hydrophis curtus</i>             | Hcur         | figshare   | <a href="https://doi.org/10.6084/m9.figshare.11391606.v5">https://doi.org/10.6084/m9.figshare.11391606.v5</a>                             |
| <i>Lacerta agilis</i>               | Lagi         | NCBI       | GCF_009819535.1                                                                                                                           |
| <i>Podarcis muralis</i>             | Pmur         | NCBI       | GCF_004329235.1                                                                                                                           |
| <i>Zootoca vivipara</i>             | Zviv         | NCBI       | GCF_011800845.1                                                                                                                           |
| <i>Salvator merianae</i>            | Smer         | NCBI       | GCA_003586115.2                                                                                                                           |
| <i>Varanus komodoensis</i>          | Vkom         | NCBI       | GCF_004798865.1                                                                                                                           |
| <i>Chrysemys picta bellii</i>       | Cpic         | Ensembl    | <a href="ftp.ensembl.org:/pub/release-102/fasta/chrysemys_picta_bellii">ftp.ensembl.org:/pub/release-102/fasta/chrysemys_picta_bellii</a> |
| <i>Pelodiscus sinensis</i>          | Psin         | Ensembl    | <a href="ftp.ensembl.org:/pub/release-102/fasta/pelodiscus_sinensis">ftp.ensembl.org:/pub/release-102/fasta/pelodiscus_sinensis</a>       |
| <i>Chelonia mydas</i>               | Cmyd         | NCBI       | GCF_015237465.1                                                                                                                           |
| <i>Alligator mississippiensis</i>   | Amis         | NCBI       | GCF_000281125.3                                                                                                                           |
| <i>Crocodylus porosus</i>           | Cpor         | Ensembl    | <a href="ftp.ensembl.org:/pub/release-102/fasta/crocodylus_porosus">ftp.ensembl.org:/pub/release-102/fasta/crocodylus_porosus</a>         |
| <i>Alligator sinensis</i>           | Asin         | NCBI       | GCF_000455745.1                                                                                                                           |
| <i>Latimeria chalumnae</i>          | Lcha         | Ensembl    | <a href="ftp.ensembl.org:/pub/release-102/fasta/latimeria_chalumnae">ftp.ensembl.org:/pub/release-102/fasta/latimeria_chalumnae</a>       |
| <i>Nanorana parkeri</i>             | Npar         | NCBI       | GCF_000935625.1                                                                                                                           |
| <i>Xenopus tropicalis</i>           | Xtro         | Ensembl    | <a href="ftp.ensembl.org:/pub/release-102/fasta/xenopus_tropicalis">ftp.ensembl.org:/pub/release-102/fasta/xenopus_tropicalis</a>         |
| <i>Leptobranchium leishanense</i>   | Llei         | NCBI       | GCA_009667805.1                                                                                                                           |
| <i>Mus musculus</i>                 | Mmus         | Ensembl    | <a href="ftp.ensembl.org:/pub/release-102/fasta/mus_musculus">ftp.ensembl.org:/pub/release-102/fasta/mus_musculus</a>                     |
| <i>Homo sapiens</i>                 | Hsap         | Ensembl    | <a href="ftp.ensembl.org:/pub/release-102/fasta/homo_sapiens">ftp.ensembl.org:/pub/release-102/fasta/homo_sapiens</a>                     |

---

|                                 |      |         |                                                                                                                                    |
|---------------------------------|------|---------|------------------------------------------------------------------------------------------------------------------------------------|
| <i>Gallus gallus</i>            | Ggal | Ensembl | <a href="ftp://ensembl.org/pub/release-102/fasta/gallus_gallus">ftp.ensembl.org:/pub/release-102/fasta/gallus_gallus</a>           |
| <i>Anas platyrhynchos</i>       | Apla | Ensembl | <a href="ftp://ensembl.org/pub/release-102/fasta/anas_platyrhynchos">ftp.ensembl.org:/pub/release-102/fasta/anas_platyrhynchos</a> |
| <i>Parus humilis</i>            | Phum | NCBI    | GCF_000331425.1                                                                                                                    |
| <i>Bos grunniens</i>            | Bmut | NCBI    | GCF_000298355.1                                                                                                                    |
| <i>Ochotona curzoniae</i>       | Ocur | NCBI    | GCF_017591425.1                                                                                                                    |
| <i>Equus caballus</i>           | Ecab | NCBI    | GCF_002863925.1                                                                                                                    |
| <i>Falco naumanni</i>           | Fnau | NCBI    | GCF_017639655.2                                                                                                                    |
| <i>Ornithorhynchus anatinus</i> | Oana | NCBI    | GCF_004115215.2                                                                                                                    |
| <i>Parus major</i>              | Pmaj | NCBI    | GCF_001522545.3                                                                                                                    |
| <i>Taeniopygia guttata</i>      | Tgut | NCBI    | GCF_003957565.2                                                                                                                    |

---

### Supplementary videos:

The behavioral experiments on the thermotropic behavior of three species of snakes (*T. baileyi*, *Pantherophis guttatus*, *Pareas menglaensis*). The Video demos showed their choices when faced with cold stimuli.
